# Supplementary material
Source: publisher figshare collection journal article supplement (https://diabetesjournals.figshare.com/articles/dataset/_/11968926)
Supplement: Supplementary file 1 [file 1]

**Table S1. Characteristics of three models of the microcirculation flow pattern**

|                    | Methods                                                                                                                                                                                                                                                                                                                                                                                                                         | Observations and Interpretations                                                                                                                                                                                                                                                                                                                                                                                                            | Functional implications                                                                                                                                                                                                                                                                                                                                                                                                                                                     |
|--------------------|---------------------------------------------------------------------------------------------------------------------------------------------------------------------------------------------------------------------------------------------------------------------------------------------------------------------------------------------------------------------------------------------------------------------------------|---------------------------------------------------------------------------------------------------------------------------------------------------------------------------------------------------------------------------------------------------------------------------------------------------------------------------------------------------------------------------------------------------------------------------------------------|-----------------------------------------------------------------------------------------------------------------------------------------------------------------------------------------------------------------------------------------------------------------------------------------------------------------------------------------------------------------------------------------------------------------------------------------------------------------------------|
| <b>Model 1</b>     | <ul style="list-style-type: none"> <li>- Scanning electron microscopy of corrosion vascular casts</li> <li>- Light microscopy with India ink injections</li> <li>- Histochemical staining of islet cell types</li> <li>- In vivo microscopy using intravital stains</li> <li>- Rat, mouse, rabbit, guinea pig, cow, horse, monkey, and human</li> </ul>                                                                         | <ul style="list-style-type: none"> <li>- Complete mantle formation</li> <li>- Non-beta-cells to beta-cells (mantle-to-core) flow order</li> <li>- The insulo-acinar portal system</li> <li>- The number - islet size dependent (1-30)</li> </ul>                                                                                                                                                                                            | <ul style="list-style-type: none"> <li>- Non-beta-cells should have an intra-islet regulatory effect on insulin secretion.</li> <li>- In turn, insulin would be secreted from the islet without affecting the secretions of the other cell types.</li> </ul>                                                                                                                                                                                                                |
| <b>Model 2</b>     | <ul style="list-style-type: none"> <li>- Scanning electron microscopic analysis of methacrylate corrosion casts of the pancreatic blood vessels</li> <li>- Reconstructions from serial sections of immunostained, India ink-infused rat islets</li> <li>- Intravital photomicroscopy of both in situ and transplanted hamster islets</li> <li>- Isolated perfused pancreases in rat, dog, monkey, and human pancreas</li> </ul> | <ul style="list-style-type: none"> <li>- Mantle with gaps for arteriole penetration into the islets</li> <li>- Beta-cells to non-beta-cells (core-to-mantle) flow order</li> <li>- The insulo-acinar portal system in small islets</li> </ul>                                                                                                                                                                                               | <ul style="list-style-type: none"> <li>- A single continuous circulation through the islet</li> <li>- The beta-cell is the primary regulator of islet hormone secretion.</li> <li>- The secretory products of the mantle cells leave the islet without influencing the beta-cell.</li> <li>- The delta-cell has limited or no function within the islet as a direct beta-cell regulator.</li> </ul>                                                                         |
| <b>Model 3</b>     | <ul style="list-style-type: none"> <li>- Microsphere studies</li> <li>- In vivo microscopy studies using intravital stains in rat and mouse islets</li> <li>- Immunostaining of islets</li> <li>- Isolated perfused human pancreas studies</li> </ul>                                                                                                                                                                           | <ul style="list-style-type: none"> <li>- Complete mantle formation</li> <li>- There is no set order of perfusion.</li> <li>- Blood flows to one hemisphere of the islet through the afferent arteriole before perfusing across to the other hemisphere.</li> <li>- Regulated flow by external and internal gates</li> <li>- Flow to and within the islet would stop approximately three times per minute at irregular intervals.</li> </ul> | <ul style="list-style-type: none"> <li>- Cells in one hemisphere of the islet are perfused before cells located in the other hemisphere</li> <li>- Beta-cells in one hemisphere could affect beta-cells located in the other hemisphere.</li> <li>- The beta-cell has an important role in the regulation of both beta- and alpha-cell secretion</li> <li>- The delta-cell has an important inhibitory regulatory role on the secretion of insulin and glucagon.</li> </ul> |
| <b>Nyman et al</b> | <ul style="list-style-type: none"> <li>- In vivo imaging of MIP-GFP mice with a bolus injection of rhodamine dextran</li> </ul>                                                                                                                                                                                                                                                                                                 | <ul style="list-style-type: none"> <li>- All three types of microcirculation were observed.</li> <li>- Model ratio of 1:2:3 with observed n of 12:7:1</li> </ul>                                                                                                                                                                                                                                                                            | <ul style="list-style-type: none"> <li>- Unknown</li> </ul>                                                                                                                                                                                                                                                                                                                                                                                                                 |
